# Supplementary material
Source: Springer Nature journal article supplement (https://www.springermedizin.de/resource/supplementary/12882_2013_746_MOESM7_ESM.pdf/9454632)

**A****Systolic BP (mmHg)**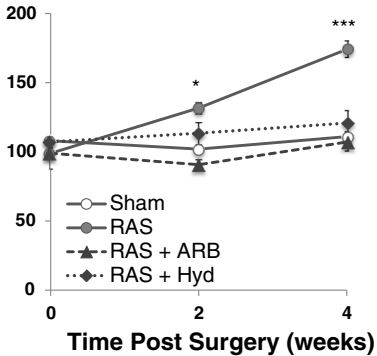**B****Angiotensin I (ng/mL/hr)**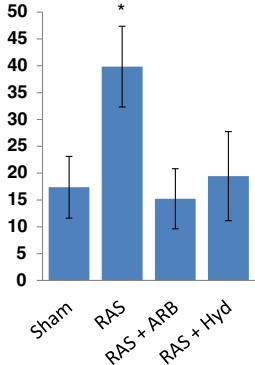

Supplement: MOESM7 [file 9454632]
